# Supplementary material
Source: publisher site journal article supplement (https://www.spandidos-publications.com/5124/downloadSupplementary)
Supplement: Supplementary file 1 [file downloadSupplementary]

Table SI. Subsequent treatment for patients in whom atezolizumab was added during their treatment process.

| Therapy                                               | Second line | Third line | Fourth or higher lines |
|-------------------------------------------------------|-------------|------------|------------------------|
| Carboplatin + etoposide + atezolizumab rechallenge, n | 3           | 0          | 0                      |
| Carboplatin + paclitaxel, n                           | 0           | 1          | 0                      |
| Amrubicin, n                                          | 7           | 0          | 0                      |
| Topotecan, n                                          | 1           | 0          | 0                      |
| CPT-11, n                                             | 0           | 1          | 0                      |
| Others, n                                             | 0           | 0          | 1                      |
| Best supportive care, n                               | 5           | -          | -                      |
